# Supplementary material for: Study on the Biodegradation of Poly(Butylene Succinate)/Wheat Bran Biocomposites
Source: Materials (Basel). 2023 Oct 25;16(21):6843. doi: 10.3390/ma16216843 (PMC10647723; doi:10.3390/ma16216843)
Supplement: Supplementary file 1 [file materials-16-06843-s001.zip › materials-2659951-supplementary.pdf]

# Study on the Biodegradation of Poly(Butylene Succinate)/Wheat Bran Biocomposites

## Supplementary data

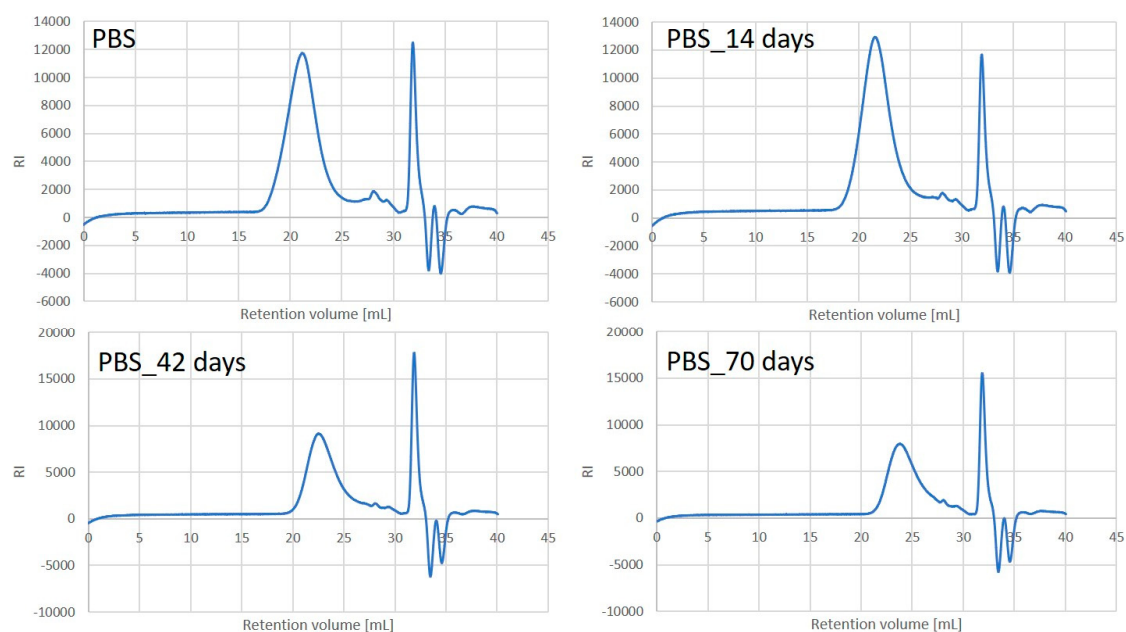

**Figure S1.** GPC chromatograms obtained for PBS before and after the specified periods of composting.

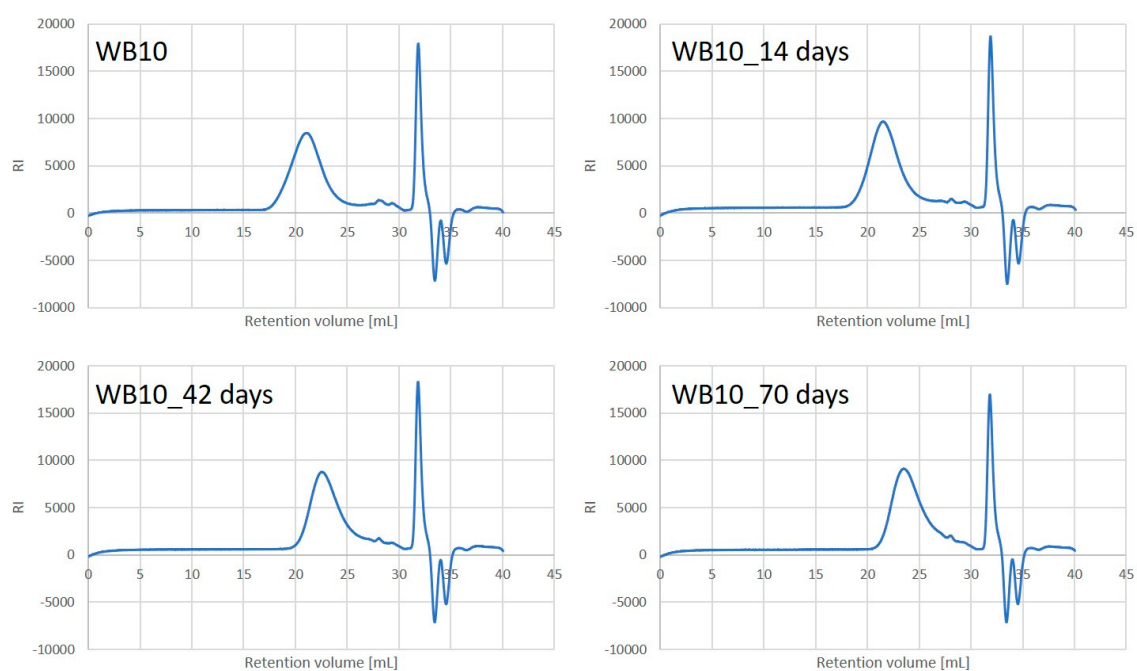

**Figure S2.** GPC chromatograms obtained for WB10 before and after the specified periods of composting.

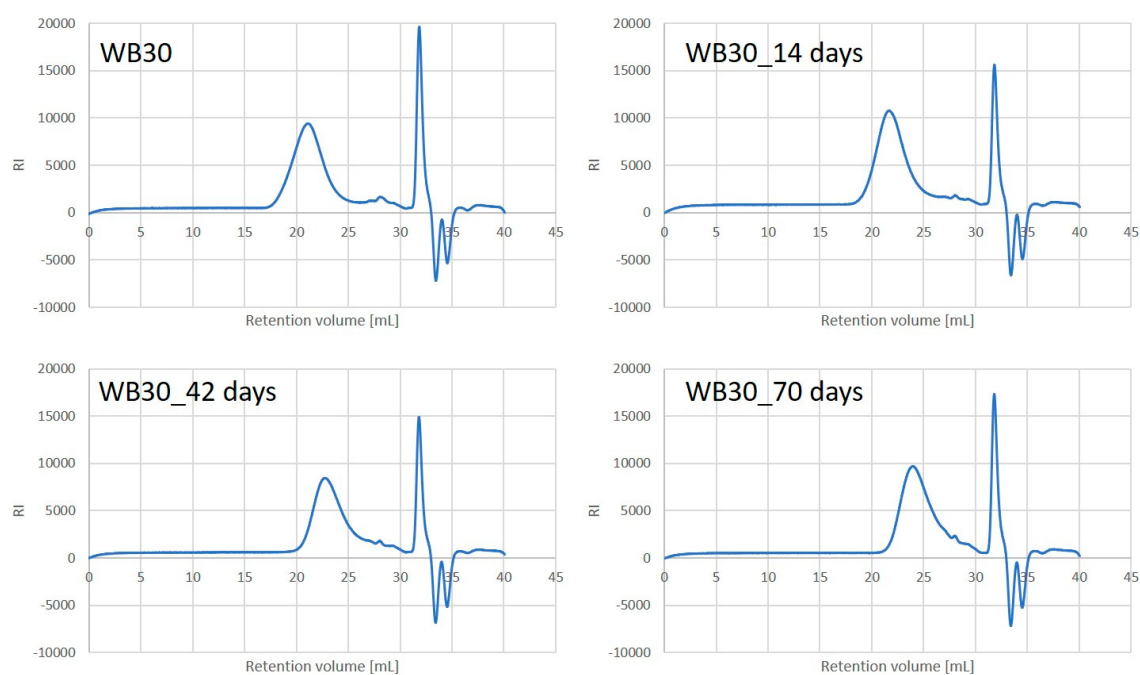

**Figure S3.** GPC chromatograms obtained for WB30 before and after the specified periods of composting.

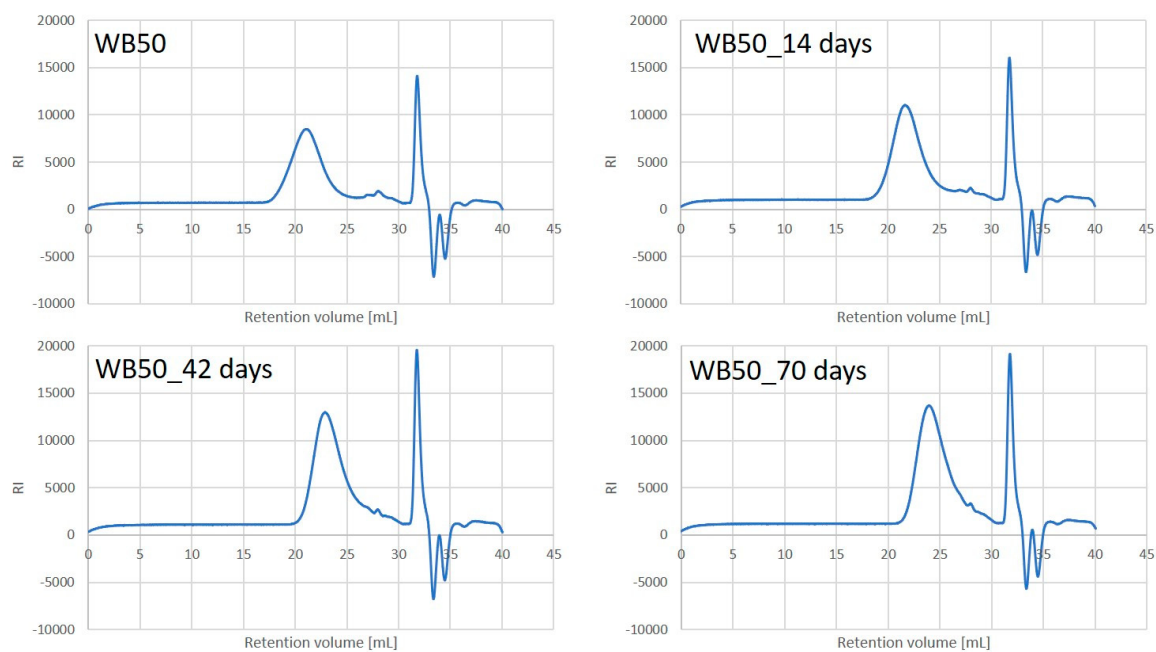

**Figure S4.** GPC chromatograms obtained for WB50 before and after the specified periods of composting.

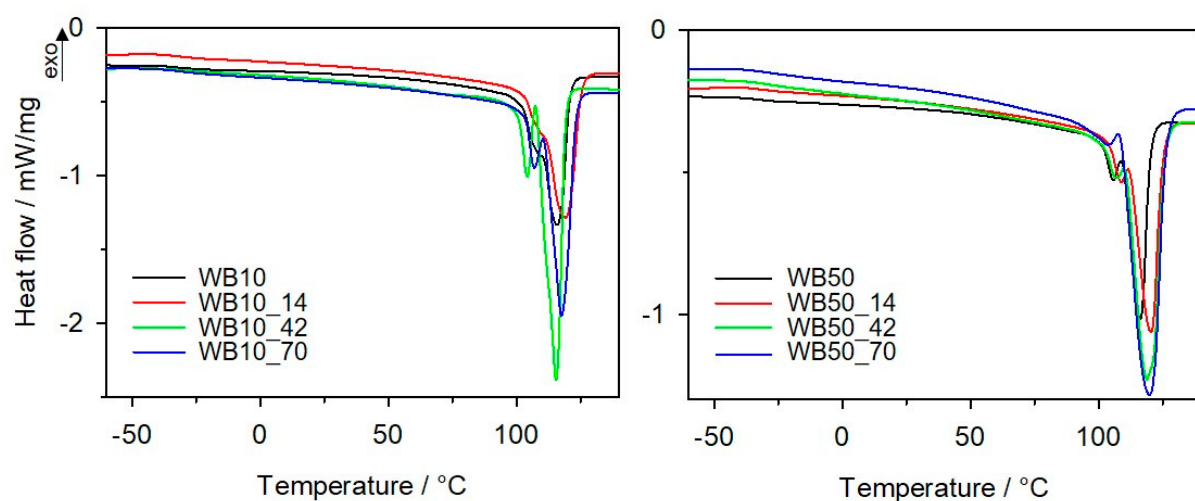

**Figure S5.** DSC thermograms (II heating cycle) of WB10 and WB50 biocomposites, obtained after a specified periods of biodegradation.

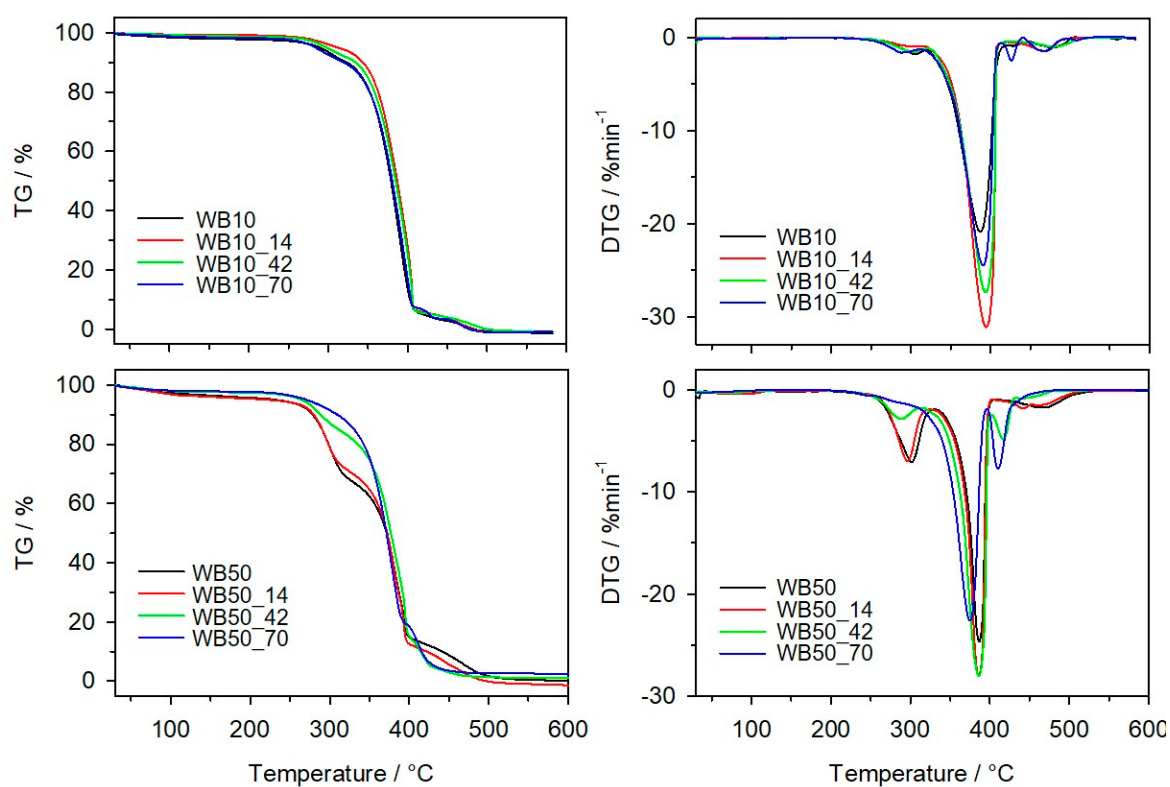

**Figure S6.** TG and DTG curves for PBS and WB30 obtained before and after composting.
